# Supplementary material for: Sequence imputation from low density single nucleotide polymorphism panel in a black poplar breeding population
Source: PubMed Central journal article supplement (PMC6471894; doi:10.1186/s12864-019-5660-y), 2019-04-18

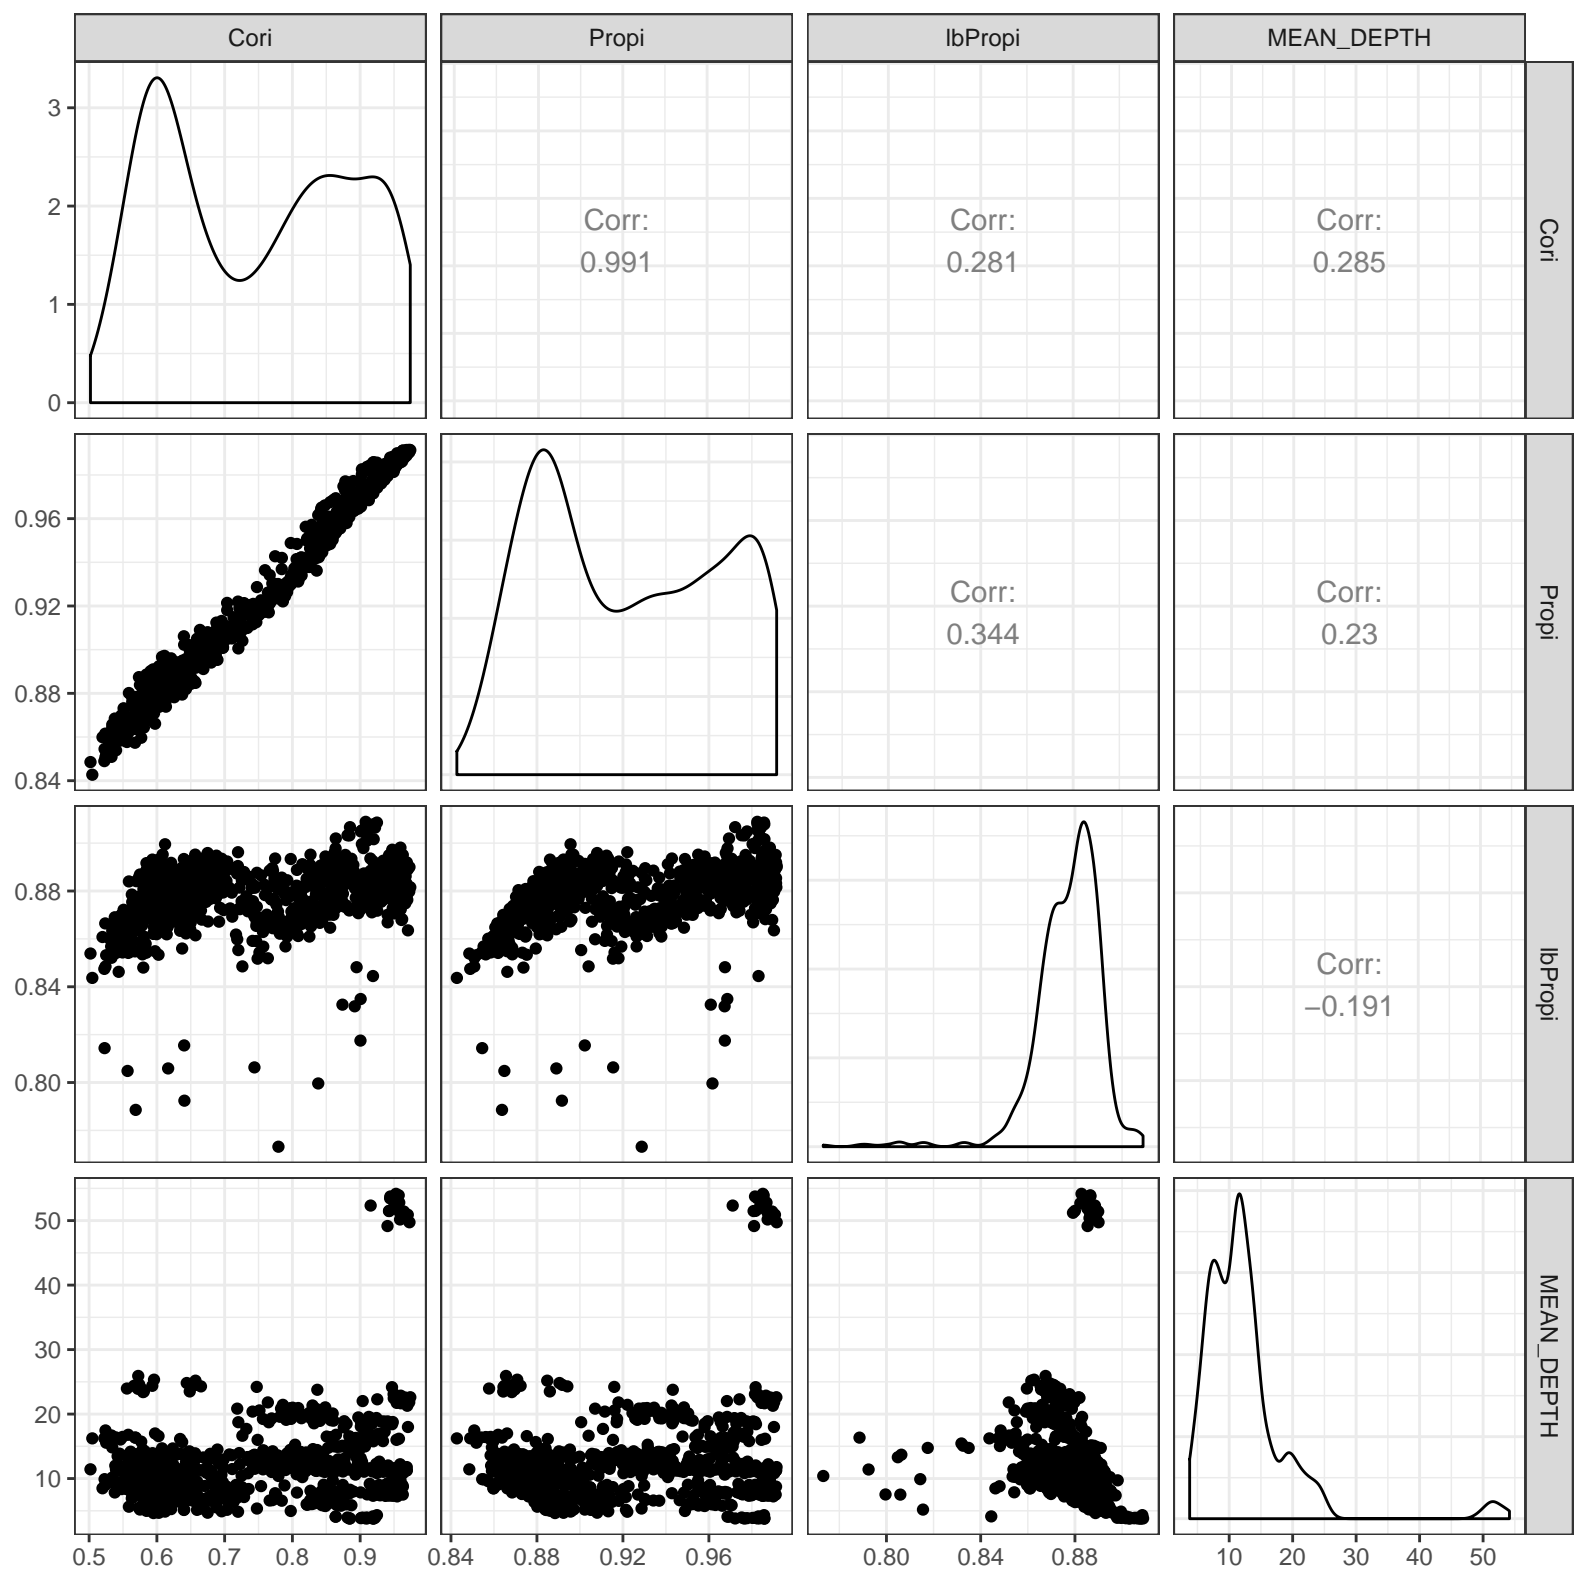

Supplement: 12864_2019_5660_MOESM3_ESM.pdf [file 12864_2019_5660_MOESM3_ESM.pdf]
