# Supplementary material for: Sequence imputation from low density single nucleotide polymorphism panel in a black poplar breeding population
Source: BMC Genomics. 2019 Apr 18;20:302. doi: 10.1186/s12864-019-5660-y (PMC6471894; doi:10.1186/s12864-019-5660-y)
Supplement: Supplementary file 1 — Sequencing, pedigree and reference information’s of each reference individuals. (CSV 4.33 kb) [file 12864_2019_5660_MOESM1_ESM.csv]

Name	Grand-parent	Parent	Progeny	Unrelated	MEAN_DEPTH	Class	Reference Genbank SRA Run number or Bioproject number	Origin
73182-009		yes			5.21	MultiplePair_parents	BioProject BreedToLast PRJNA483561	Pyrénées-Atlantiques, Licq-Arthérey
73193-091		yes			6.53	MultiplePair_parents	BioProject BreedToLast PRJNA483561	Hautes Pyrénées, Soulon
71034-2-406		yes			6.84	MultiplePair_parents	BioProject BreedToLast PRJNA483561	Savoie
73193-089		yes			7.16	MultiplePair_parents	BioProject BreedToLast PRJNA483561	Hautes Pyrénées, Soulon
72131-017		yes			8.79	MultiplePair_parents	BioProject BreedToLast PRJNA483561	Puy de Dôme, Coudes
73193-056		yes			8.83	MultiplePair_parents	BioProject BreedToLast PRJNA483561	Hautes Pyrénées, Soulon
72146-11		yes			8.85	MultiplePair_parents	BioProject BreedToLast PRJNA483561	Gard, Dions
H480		yes			9.66	MultiplePair_parents	BioProject BreedToLast PRJNA483561	NA
3824-3		yes			11.37	MultiplePair_parents	BioProject BreedToLast PRJNA483561	NA
72131-036		yes			12.08	MultiplePair_parents	BioProject BreedToLast PRJNA483561	Puy de Dôme, Coudes
72145-007		yes			16.36	MultiplePair_parents	SRR3045889	Gard, Brignon
71069-914		yes			24.33	MultiplePair_parents	BioProject BreedToLast PRJNA483561	Haute-Savoie, Seyssel
GIS89-052			yes		11.40	MultiplePair_progrenies	BioProject BreedToLast PRJNA483561	controlled crossbreeds
GIS68-098			yes		11.72	MultiplePair_progrenies	BioProject BreedToLast PRJNA483561	controlled crossbreeds
GIS70-046			yes		12.78	MultiplePair_progrenies	BioProject BreedToLast PRJNA483561	controlled crossbreeds
GIS60-076			yes		14.16	MultiplePair_progrenies	BioProject BreedToLast PRJNA483561	controlled crossbreeds
GIS84-001			yes		14.95	MultiplePair_progrenies	BioProject BreedToLast PRJNA483561	controlled crossbreeds
GIS88-018			yes		20.73	MultiplePair_progrenies	BioProject BreedToLast PRJNA483561	controlled crossbreeds
71041-3-402		yes			6.75	Factorial_parents	BioProject BreedToLast PRJNA483561	Savoie, Saint-Jean-de-Maurienne
71077-308		yes			7.84	Factorial_parents	SRR3045875 + SRR3045876 + SRR3045878 + SRR3045880	Ain, Meximieux
SAN-GIORGIO	yes				10.63	Factorial_parents	BioProject BreedToLast PRJNA483561	Ornemental, origin unknown
SSC (Selle sur cher)		yes			11.39	Factorial_parents	BioProject BreedToLast PRJNA483561	Loir-et-Cher, Selles-sur-Cher
71072-501		yes			12.94	Factorial_parents	SRR3045961 + SRR3045962	Savoie, Saint-Genix-sur-Giers
SRZ (Sarazin)		yes			13.56	Factorial_parents	SRR3045895	Lot, Cahors
92510-1		yes			13.58	Factorial_parents	BioProject BreedToLast PRJNA483561	Nièvre, La-Celle-sur-Loire
VGN-CZB25 (Vert de Garonne – Cazebon 25)		yes			22.40	Factorial_parents	SRR3045896 + SRR3045902	NA
BDG (Blanc de Garonne)		yes			51.79	Factorial_parents	SRR3045881 + SRR3045882 + SRR3045883 + SRR3045885 + SRR3045886 + SRR3045887	NA
662200216		yes	yes		3.94	Factorial_progrenies	BioProject BreedToLast PRJNA483561	controlled crossbreeds
662200357			yes		6.05	Factorial_progrenies	BioProject BreedToLast PRJNA483561	controlled crossbreeds
662200037		yes	yes		7.54	Factorial_progrenies	BioProject BreedToLast PRJNA483561	controlled crossbreeds
662200039			yes		9.04	Factorial_progrenies	BioProject BreedToLast PRJNA483561	controlled crossbreeds
662200426			yes		11.37	Factorial_progrenies	BioProject BreedToLast PRJNA483561	controlled crossbreeds
662201338			yes		11.37	Factorial_progrenies	BioProject BreedToLast PRJNA483561	controlled crossbreeds
662200057			yes		11.54	Factorial_progrenies	BioProject BreedToLast PRJNA483561	controlled crossbreeds
662200098			yes		16.57	Factorial_progrenies	BioProject BreedToLast PRJNA483561	controlled crossbreeds
662200495			yes		18.87	Factorial_progrenies	BioProject BreedToLast PRJNA483561	controlled crossbreeds
662200654			yes		19.33	Factorial_progrenies	BioProject BreedToLast PRJNA483561	controlled crossbreeds
52-27				yes	5.06	Unrelated	BioProject BreedToLast PRJNA483561	NA
71040				yes	7.34	Unrelated	BioProject BreedToLast PRJNA483561	France, Savoie, Aiton
73193-084				yes	9.33	Unrelated	BioProject BreedToLast PRJNA483561	Hautes Pyrénées, Soulon
71030-501				yes	10.94	Unrelated	BioProject BreedToLast PRJNA483561	Savoie, Rognaix
73193-097				yes	13.68	Unrelated	BioProject BreedToLast PRJNA483561	Hautes Pyrénées, Soulon
72149-015				yes	13.78	Unrelated	BioProject BreedToLast PRJNA483561	Gard, Codolet
